# Supplementary material
Source: MDPI journal article supplement (https://www.mdpi.com/2073-4395/11/5/967)
Supplement: s1 [file s1]

## SUPPLEMENTARY MATERIALS

Table S1. Pearson correlation coefficient between the *Parastagosnopora nodorum* occurrence and meteorological factors. The data in red indicates significant correlations, (\*)  $p < 0.05$ .

| Variable                         | Month  |        |        |        |        |        |         |        |        |         |        |             |
|----------------------------------|--------|--------|--------|--------|--------|--------|---------|--------|--------|---------|--------|-------------|
|                                  | 1      | 2      | 3      | 4      | 5      | 6      | 7       | 8      | 9      | 10      | 11     | 12          |
| Absolute maximum temperature     | -0.064 | 0.009  | -0.098 | -0.176 | 0.233* | -0.046 | -0.076  | 0.116  | 0.113  | -0.431* | -0.123 | 0.140       |
| Absolute minimum temperature     | -0.105 | 0.090  | 0.089  | -0.039 | 0.042  | -0.049 | 0.039   | -0.018 | 0.008  | 0.015   | 0.040  | 0.153       |
| Number of days with rainfall     | -0.118 | 0.247* | 0.059  | 0.115  | -0.109 | 0.081  | 0.140   | -0.178 | -0.106 | -0.004  | 0.257* | 0.126       |
| Number of days with snowfall     | 0.084  | -0.116 | -0.091 | -0.131 | 0.111  |        |         |        | -0.025 | -0.012  | 0.021  | -<br>0.247* |
| Number of days with snow cover   | 0.202* | -0.156 | -0.075 | -0.167 | -0.025 |        |         |        |        | -0.011  | -0.156 | -0.144      |
| Daily maximum sum of rainfall    | -0.062 | 0.139  | 0.010  | -0.050 | 0.106  | 0.296* | 0.023   | -0.097 | -0.191 | -0.080  | 0.097  | 0.165       |
| Monthly sum of rainfall          | -0.095 | 0.164  | 0.024  | -0.032 | -0.014 | 0.298* | -0.046  | -0.164 | -0.149 | -0.053  | 0.281* | 0.058       |
| Minimum near-surface temperature | -0.055 | 0.160  | 0.120  | 0.058  | 0.067  | -0.090 | -0.117  | -0.020 | -0.092 | -0.016  | 0.092  | 0.195       |
| First day of maximum rainfall    | -0.018 | 0.225  | 0.064  | -0.026 | 0.322* | 0.111  | 0.083   | -0.082 | -0.172 | -0.151  | 0.186  | -0.124      |
| Average maximum temperature      | -0.192 | 0.031  | -0.109 | -0.182 | 0.155  | -0.060 | -0.267* | 0.126  | 0.023  | -0.253* | -0.016 | 0.276*      |
| Monthly average temperature      | -0.165 | 0.088  | -0.055 | -0.157 | 0.142  | -0.019 | -0.276* | 0.118  | -0.057 | -0.272* | -0.006 | 0.297*      |
| Average minimum temperature      | -0.147 | 0.124  | -0.024 | -0.101 | 0.091  | 0.040  | -0.181  | 0.118  | -0.130 | -0.190  | -0.039 | 0.285*      |

Table S2. Pearson correlation coefficient between the *Parastagosnopora avenae* occurrence and meteorological factors. The data in red indicates significant correlations, (\*)  $p < 0.05$ .

| Variable                         | Month  |        |         |        |        |        |         |         |         |         |        |         |
|----------------------------------|--------|--------|---------|--------|--------|--------|---------|---------|---------|---------|--------|---------|
|                                  | 1      | 2      | 3       | 4      | 5      | 6      | 7       | 8       | 9       | 10      | 11     | 12      |
| Absolute maximum temperature     | 0.035  | 0.132  | -0.036  | -0.095 | 0.153  | 0.202* | 0.177   | 0.341*  | 0.342*  | -0.165  | 0.043  | 0.264*  |
| Absolute minimum temperature     | -0.144 | 0.214* | 0.182   | -0.044 | 0.091  | 0.063  | -0.138  | -0.085  | -0.020  | -0.084  | -0.035 | 0.141   |
| Number of days with rainfall     | -0.093 | 0.292* | 0.265*  | 0.090  | -0.002 | 0.010  | -0.008  | -0.325* | -0.123  | -0.193  | 0.154  | 0.170   |
| Number of days with snowfall     | 0.151  | -0.048 | -0.201* | -0.174 | -0.037 |        |         |         | 0.057   | -0.018  | -0.048 | -0.294* |
| Number of days with snow cover   | 0.182  | -0.177 | -0.057  | -0.181 | 0.057  |        |         |         |         | 0.042   | -0.133 | -0.172  |
| Daily maximum sum of rainfall    | -0.066 | 0.208* | -0.020  | 0.006  | 0.120  | 0.082  | -0.018  | -0.193  | -0.235* | -0.186  | 0.073  | -0.002  |
| Monthly sum of rainfall          | -0.066 | 0.249* | 0.049   | -0.027 | 0.046  | 0.092  | -0.110  | -0.298* | -0.178  | -0.209* | 0.161  | -0.095  |
| Minimum near-surface temperature | -0.096 | 0.287* | 0.192   | 0.037  | 0.114  | 0.103  | -0.268* | -0.094  | -0.101  | -0.098  | -0.061 | 0.156   |
| First day of maximum rainfall    | -0.065 | 0.293* | 0.074   | 0.025  | 0.296* | -0.094 | -0.048  | 0.041   | -0.062  | -0.041  | 0.186  | -0.142  |
| Average maximum temperature      | -0.189 | 0.193  | -0.012  | -0.141 | 0.098  | 0.105  | 0.031   | 0.368*  | 0.154   | -0.143  | 0.157  | 0.399*  |
| Monthly average temperature      | -0.192 | 0.227  | 0.067   | -0.125 | 0.102  | 0.123  | 0.002   | 0.350*  | 0.063   | -0.258* | 0.084  | 0.394*  |
| Average minimum temperature      | -0.195 | 0.241  | 0.114   | -0.085 | 0.092  | 0.112  | -0.040  | 0.267*  | -0.069  | -0.279* | -0.015 | 0.362*  |

Table S3. Pearson correlation coefficient between the *Zymoseptoria tritici* occurrence and meteorological factors. The data in red indicates significant correlations, (\*)  $p < 0.05$ .

| Variable                         | Month   |        |        |        |        |        |        |         |        |         |        |        |
|----------------------------------|---------|--------|--------|--------|--------|--------|--------|---------|--------|---------|--------|--------|
|                                  | 1       | 2      | 3      | 4      | 5      | 6      | 7      | 8       | 9      | 10      | 11     | 12     |
| Absolute maximum temperature     | -0.120  | 0.230* | 0.011  | 0.033  | -0.030 | 0.170  | 0.064  | 0.116   | 0.258* | 0.022   | 0.043  | -0.021 |
| Absolute minimum temperature     | -0.123  | 0.108  | 0.093  | -0.129 | -0.045 | 0.114  | -0.140 | -0.014  | -0.005 | -0.062  | -0.080 | 0.087  |
| Number of days with rainfall     | -0.156  | 0.192  | 0.136  | 0.002  | 0.181  | -0.081 | -0.047 | -0.331* | -0.046 | -0.091  | -0.067 | -0.032 |
| Number of days with snowfall     | 0.109   | 0.072  | -0.047 | -0.142 | 0.031  |        |        |         | 0.111  | 0.147   | 0.119  | 0.017  |
| Number of days with snow cover   | 0.134   | 0.032  | 0.034  | -0.025 | 0.111  |        |        |         |        | 0.166   | 0.131  | 0.091  |
| Daily maximum sum of rainfall    | -0.130  | 0.168  | -0.132 | 0.004  | 0.118  | -0.022 | -0.024 | -0.014  | 0.028  | 0.004   | 0.181  | -0.017 |
| Monthly sum of rainfall          | -0.097  | 0.210* | -0.040 | 0.056  | 0.154  | 0.011  | -0.049 | -0.171  | 0.018  | -0.021  | 0.092  | -0.008 |
| Minimum near-surface temperature | -0.103  | 0.139  | 0.096  | -0.080 | -0.071 | 0.136  | -0.091 | -0.010  | 0.019  | -0.006  | -0.112 | 0.061  |
| First day of maximum rainfall    | 0.048   | 0.055  | -0.164 | 0.032  | 0.145  | 0.011  | -0.056 | 0.116   | 0.157  | -0.013  | -0.017 | -0.168 |
| Average maximum temperature      | -0.186  | 0.177  | 0.046  | -0.019 | -0.092 | 0.232* | -0.033 | 0.263*  | 0.098  | -0.060  | 0.015  | 0.095  |
| Monthly average temperature      | -0.210* | 0.177  | 0.094  | -0.025 | -0.071 | 0.250* | -0.041 | 0.238*  | 0.108  | -0.152  | -0.060 | 0.077  |
| Average minimum temperature      | -0.219* | 0.158  | 0.107  | -0.050 | -0.031 | 0.231* | -0.075 | 0.168   | 0.049  | -0.201* | -0.127 | 0.060  |

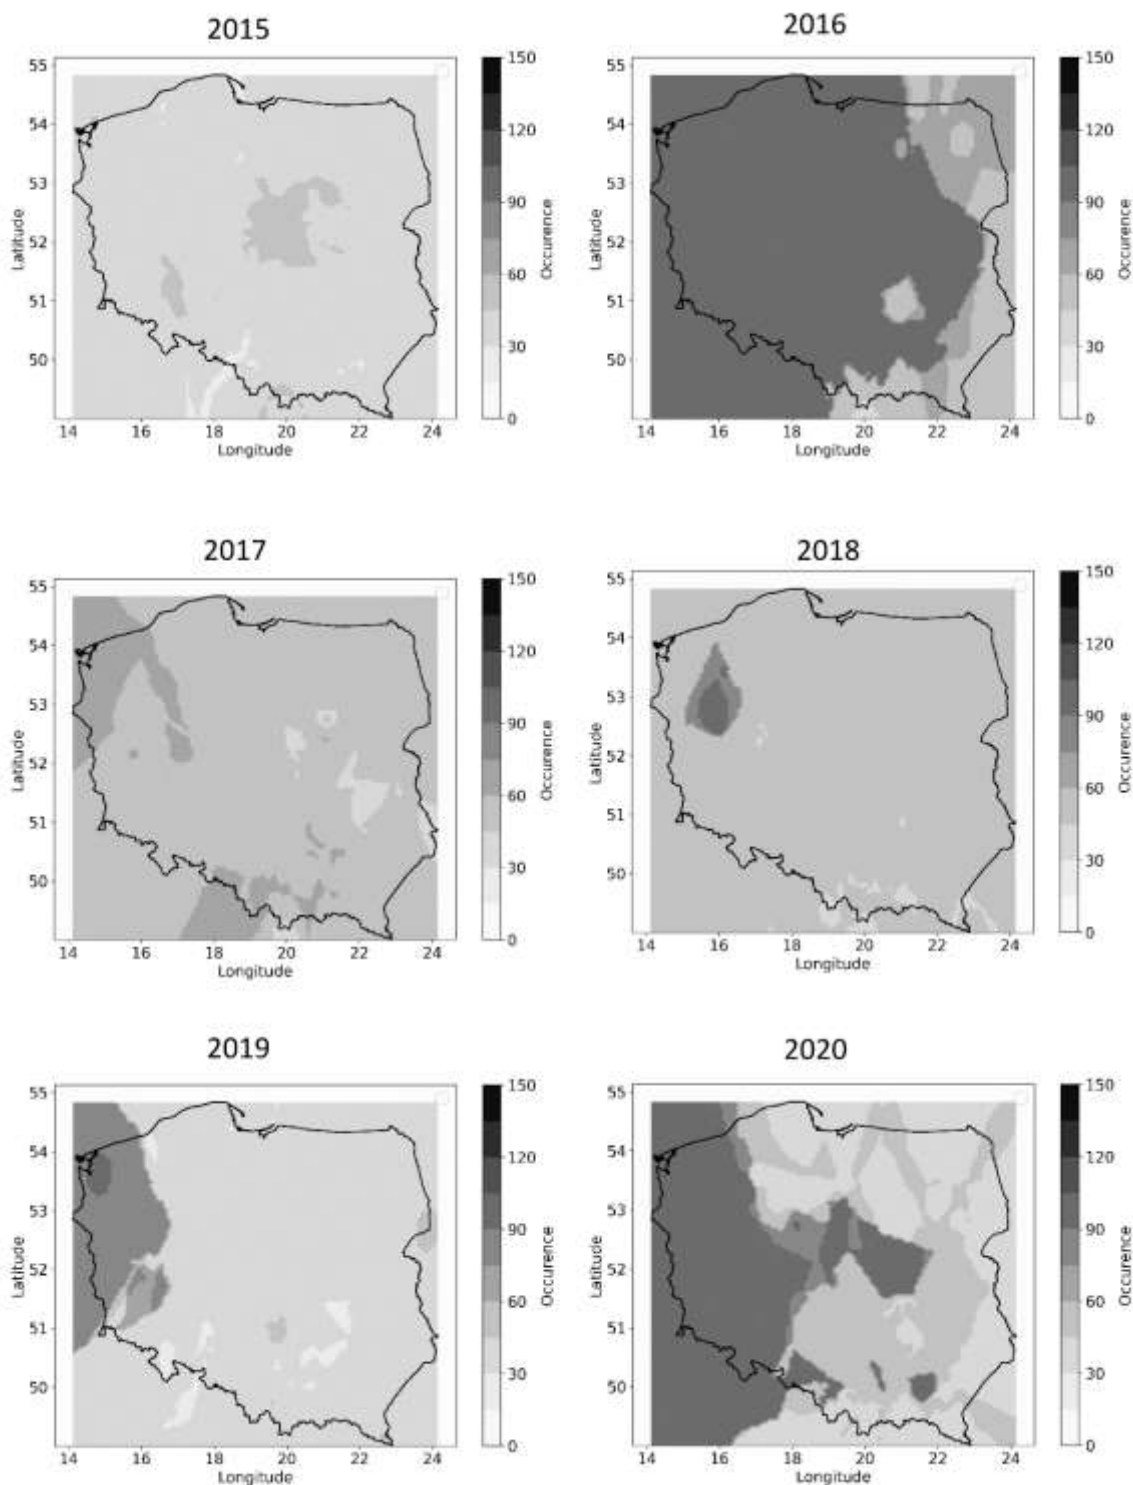

**Figure S1.** Visualisation of the model estimating number of winter wheat and winter triticale leaves affected by *P. nodorum*. Grey scale bar of the occurrence: 150 leaves = 43 %, 120 leaves = 34 %, 90 leaves = 26 %, 60 leaves = 17 %, 30 leaves = 9 % in the 2015-2020 period.

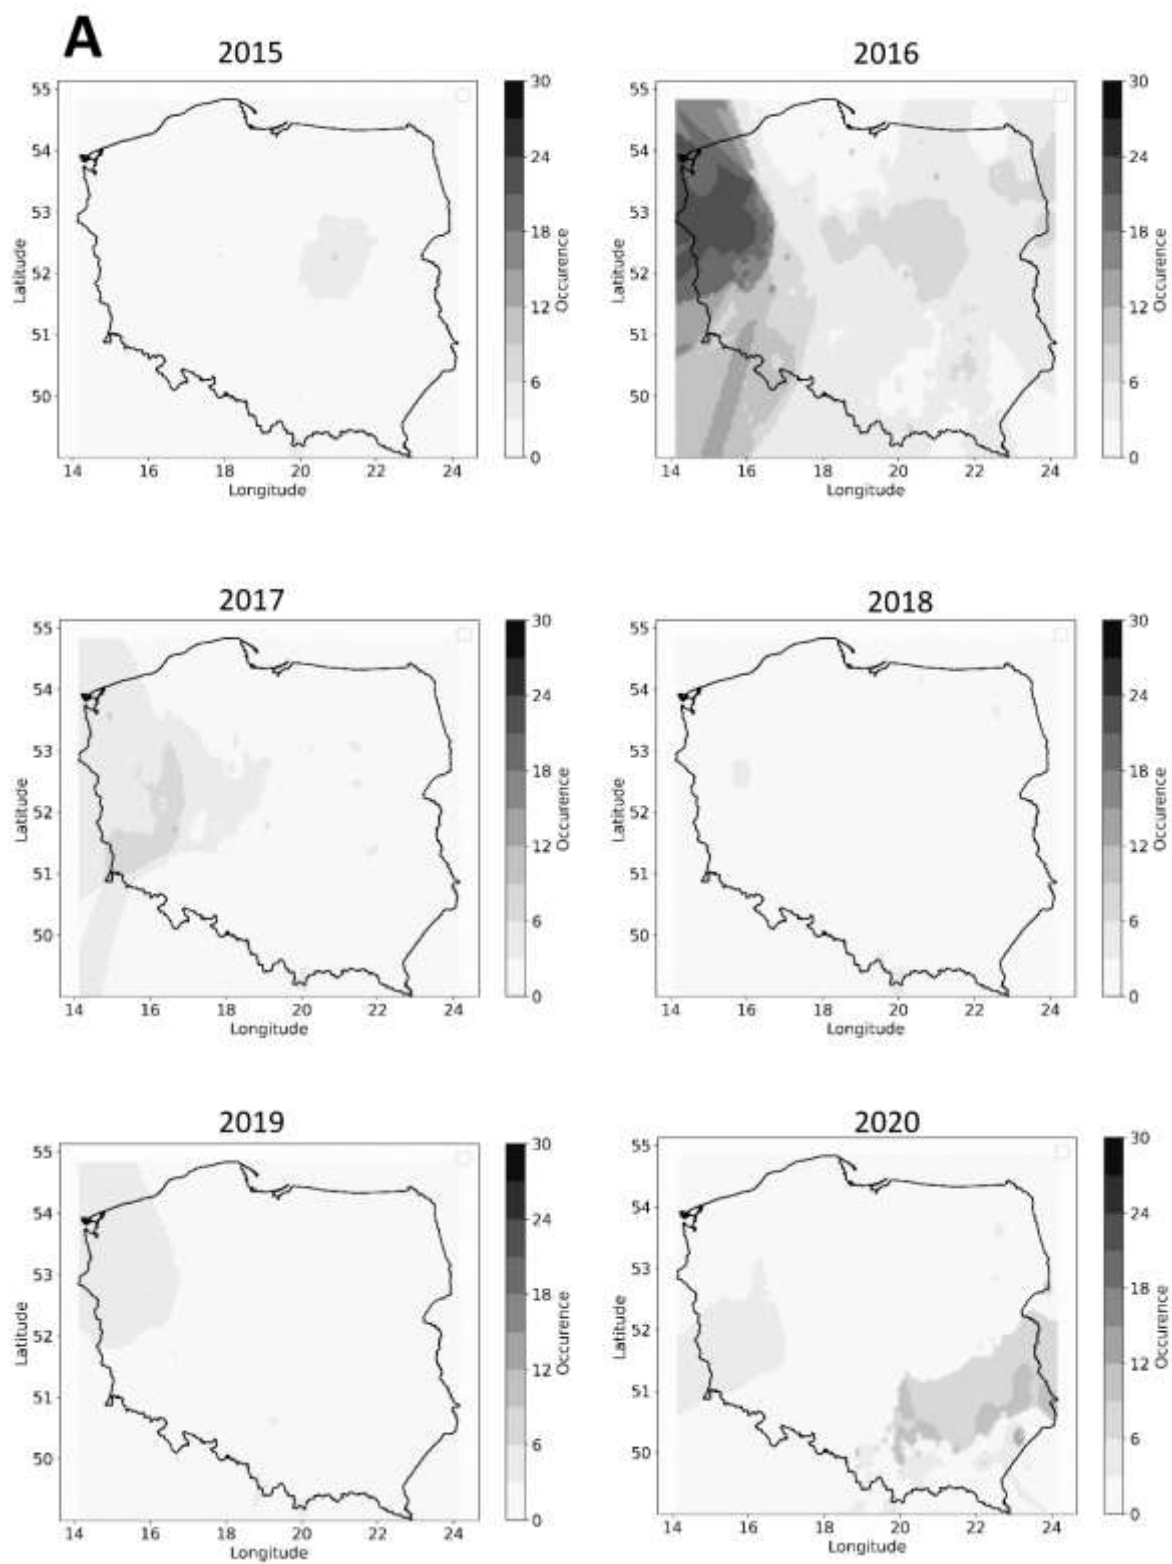

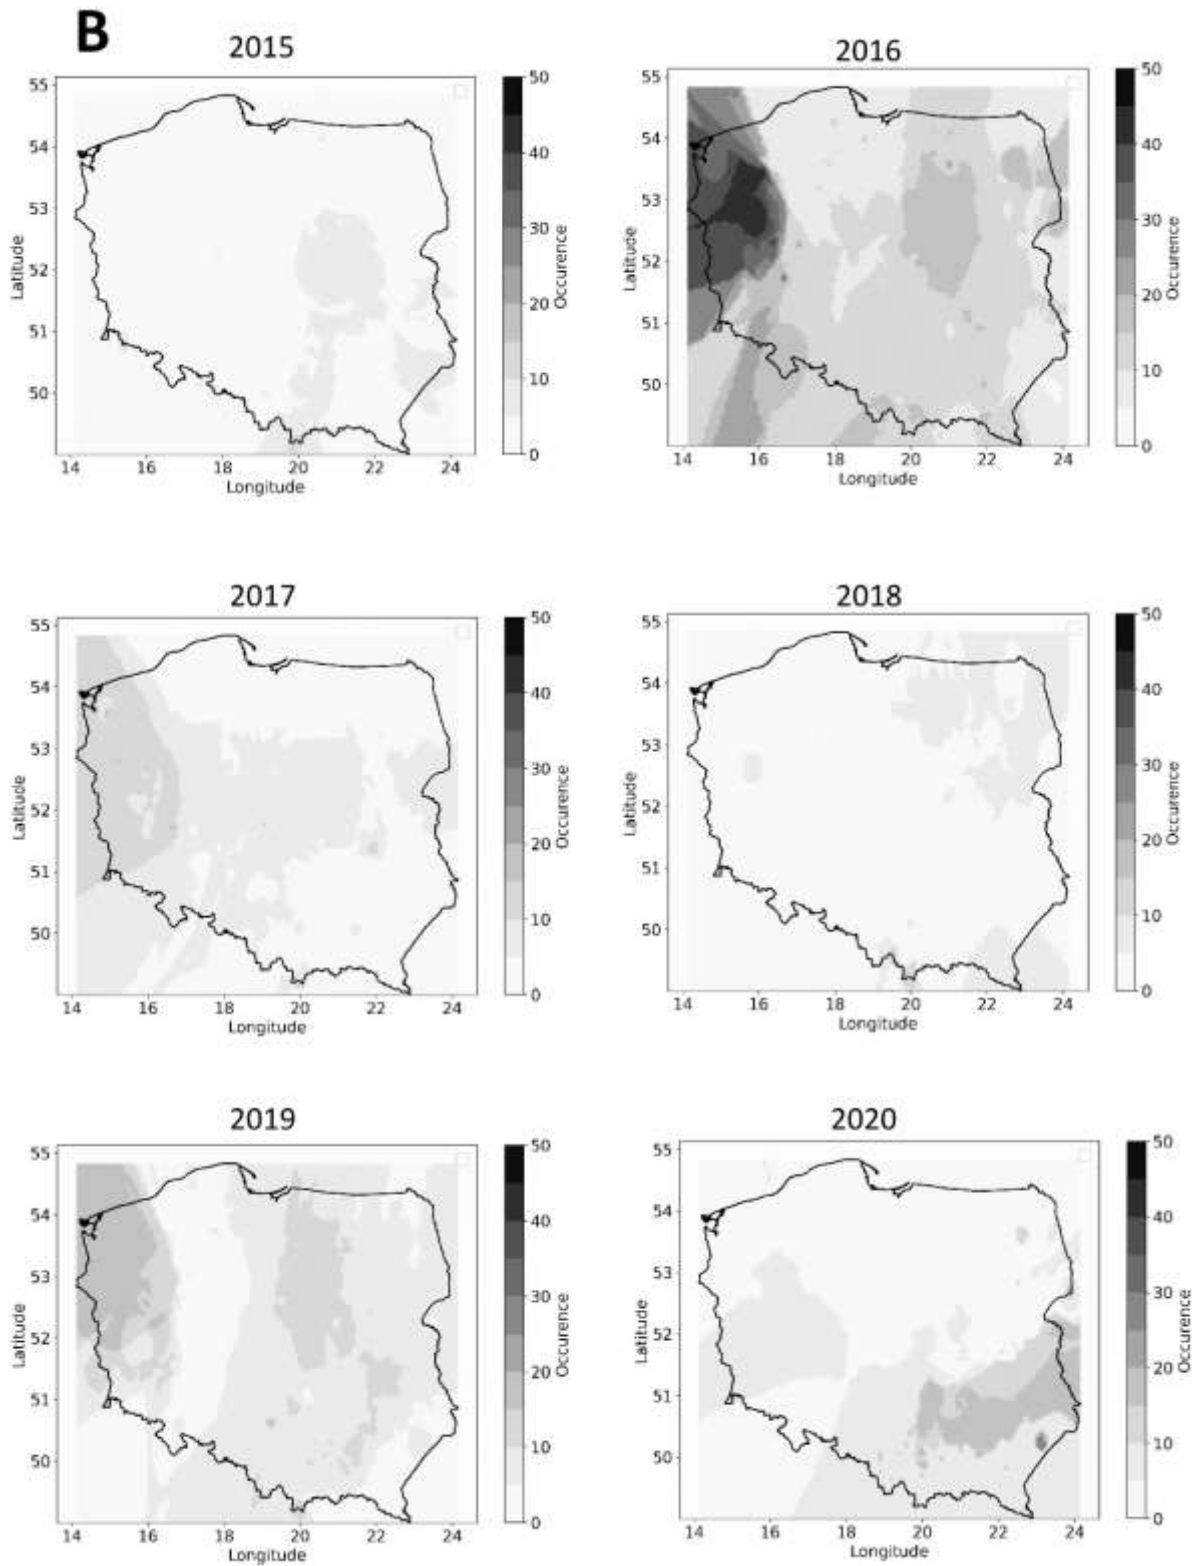

**Figure S2.** Visualisation of the model estimating number of winter wheat leaves (A) and winter triticale leaves (B) affected by *P. avenae*. Grey scale bar of the occurrence: 50 leaves = 14 %, 40 leaves = 11 %, 30 leaves = 9 %, 24 leaves = 7 %, 20 leaves = 6 %, 18 leaves = 5 %, 12, leaves = 3 %, 10 leaves = 3 %, 6 leaves = 2 % in the 2015-2020 period.

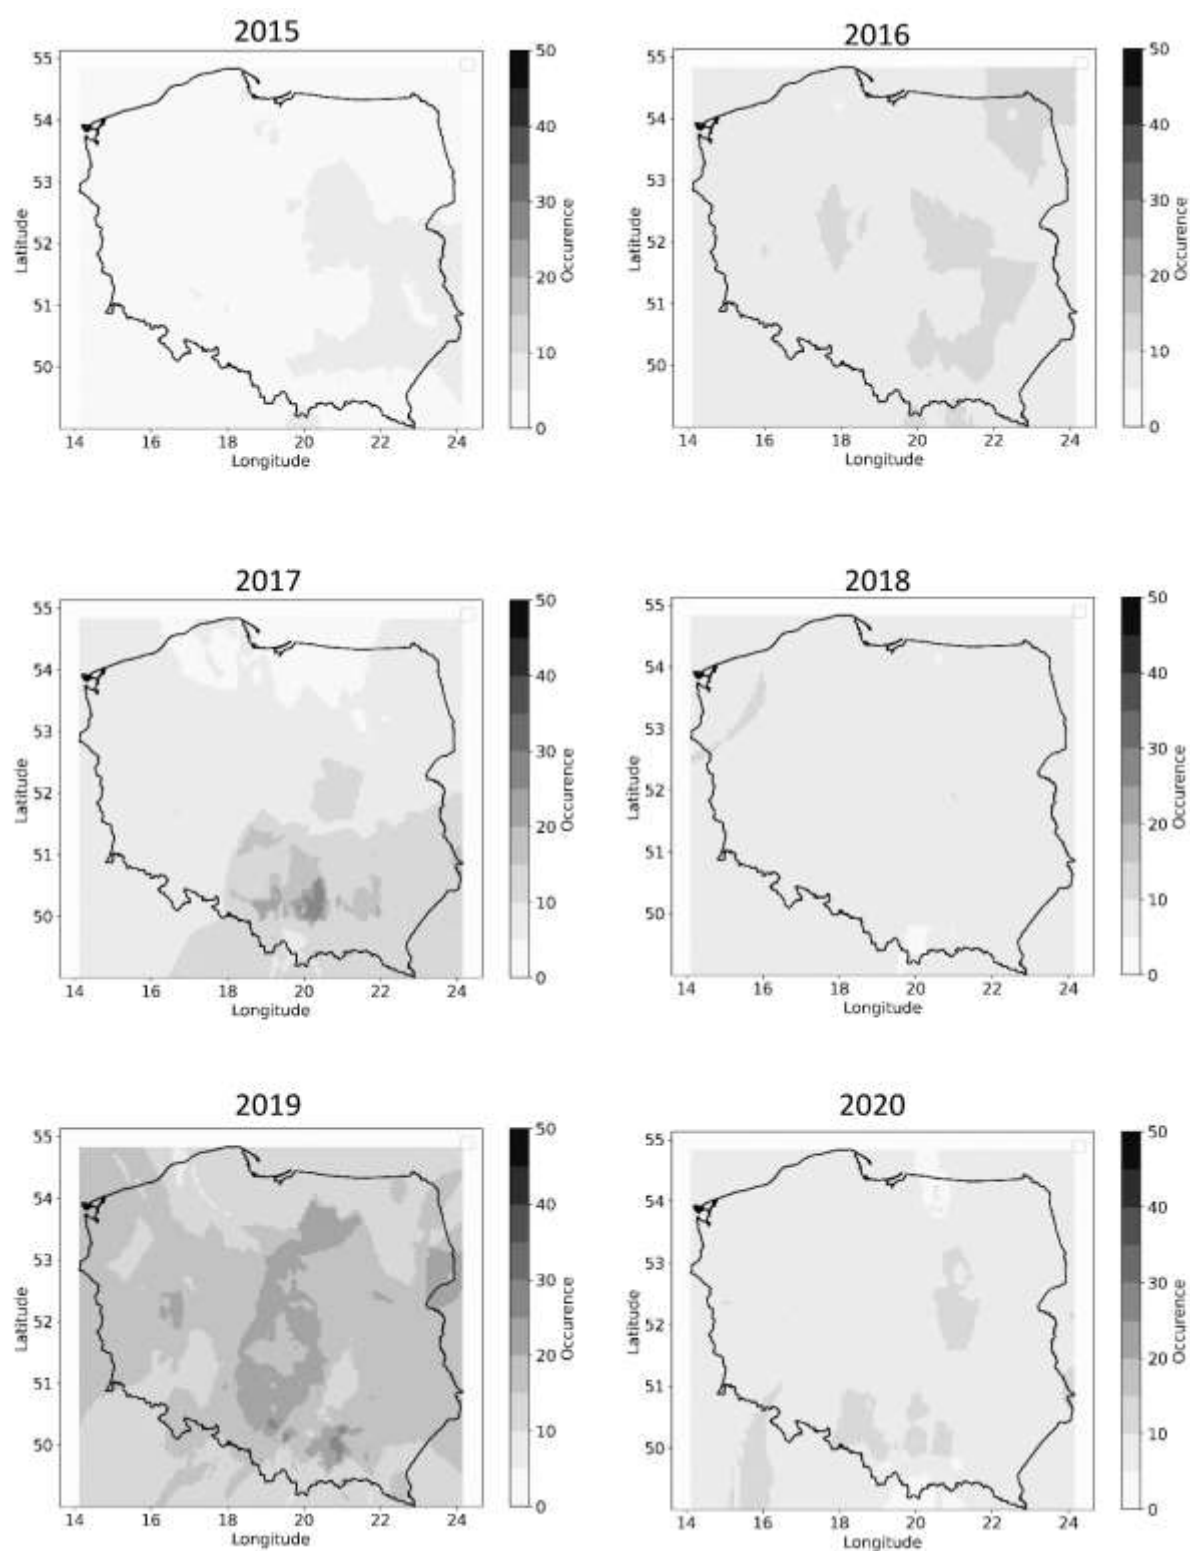

**Figure S3.** Visualisation of the model estimating number of winter triticale leaves affected by *Z. tritici*. Grey scale bar of the occurrence: 50 leaves = 14 %, 40 leaves = 11 %, 30 leaves = 9 %, 20 leaves = 6 %, 10 leaves = 3 % in the 2015-2020 period.

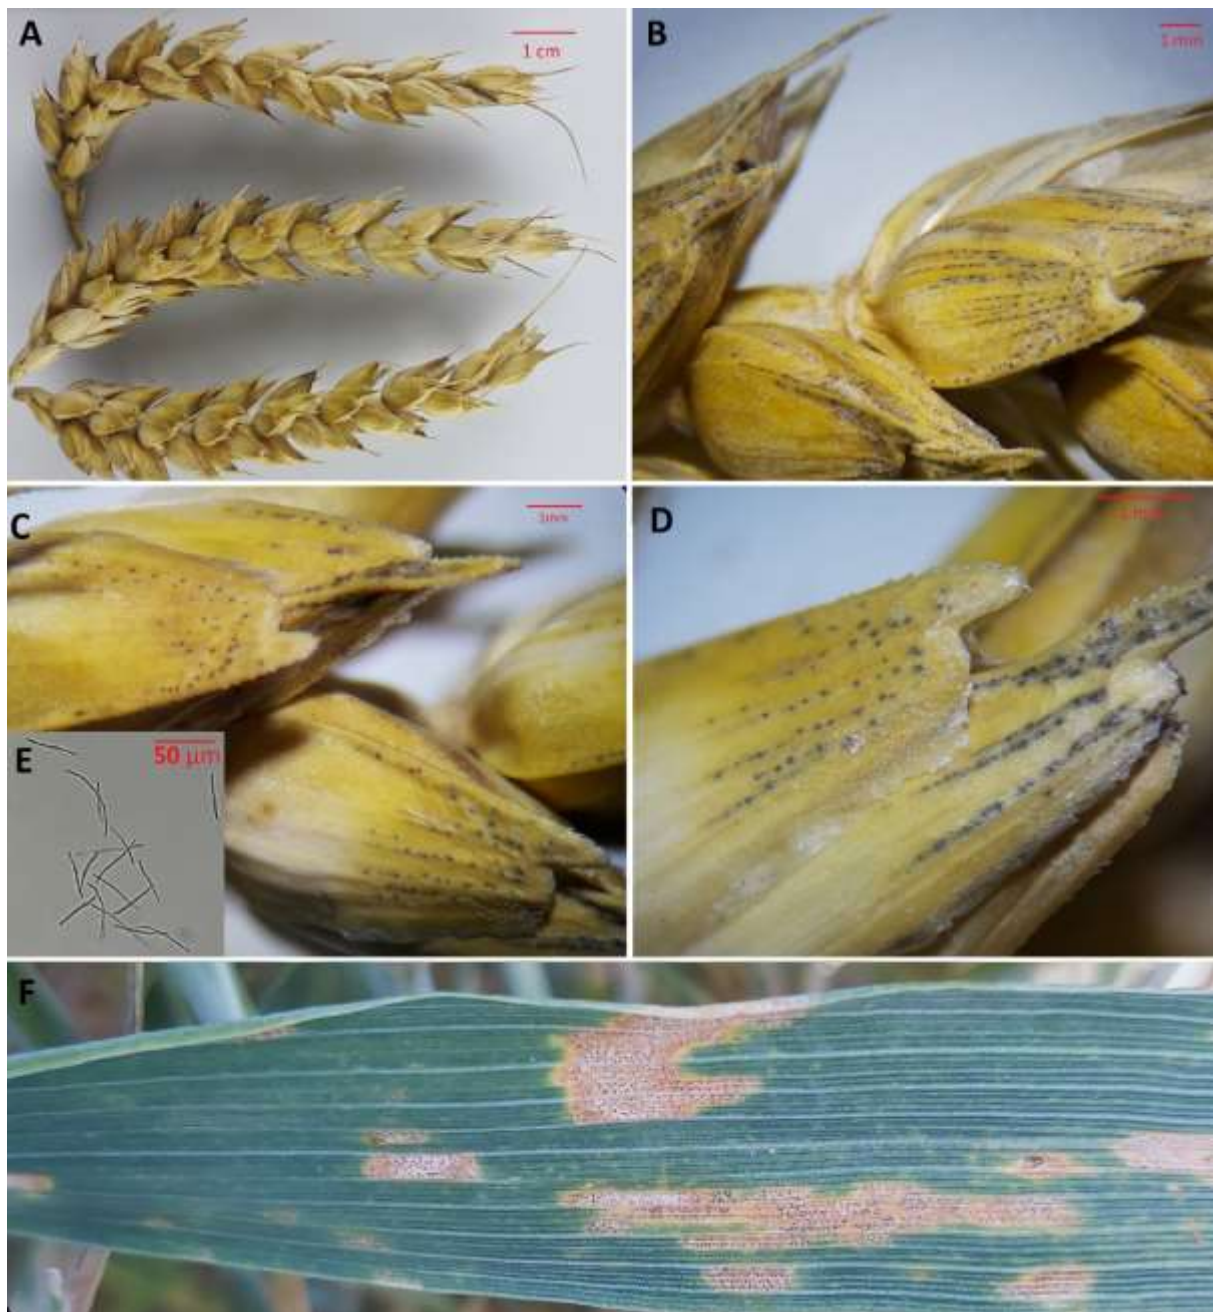

**Figure S4.** *Z. tritici* pycnidia on glumes of winter wheat cultivar Fidelius (A, B, C, D), conidia (E) and pycnidia on a leaf (F).
